# Supplementary material
Source: Springer Nature journal article supplement (https://www.springermedizin.de/resource/supplementary/12888_2013_1352_MOESM3_ESM.pdf/9479980)

# Explanatory model for the prevention of the onset of depression in primary care

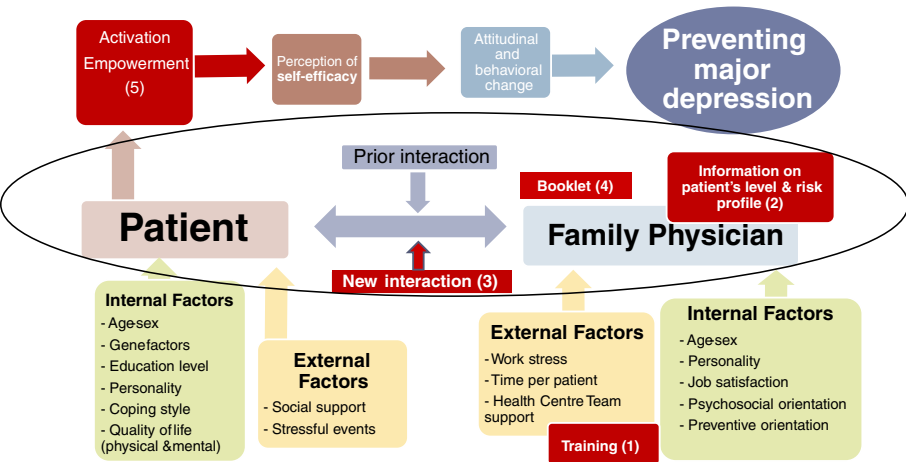

Supplement: MOESM3 [file 9479980]
